# Supplementary material
Source: PubMed Central journal article supplement (PMC7160044)

*Supplementary Material for*

**On the Feasibility of Mapping Protein-Binding Motifs in Heparin Chains using a Combination of Ion-Mobility and Top-Down Mass Spectrometry**

Yunlong Zhao and Igor A. Kaltashov

**Figure S1.** Negative ion ESI MS of the synthetic pentasaccharide **(A)** and dp10 **(B)**.

**Figure S2.** Zoomed views of the precursor regions in CID fragment ion mass spectra of  $(\text{FGF}\cdot\text{pS})^{+7}$  acquired at different collision voltages.

**Figure S3.** CIU fingerprint graphs of  $\text{FGF}^{+7}$  **(A)**,  $(\text{FGF}\cdot\text{pS})^{+7}$  **(B)** and  $\text{FGF}^{+8}$  **(C)**.

**Figure S4.** Two-dimensional IMS/MS plots for fragments ions derived from  $\text{FGF}^{+8}$  **(A)**,  $(\text{FGF}\cdot\text{pS})^{+8}$  **(B)** and  $\text{FGF}^{+7}$  **(C)** at several representative collisional voltages. Labels on the graphs highlight critical mass and conformation changes.

**Figure S5.** CIU fingerprints of  $(\text{FGF}\cdot\text{dp10})^{+8}$  and  $(\text{FGF}\cdot\text{dp10})^{+7}$  representing binary protein/heparin oligomer complexes in the FGF/dp10 mixture.

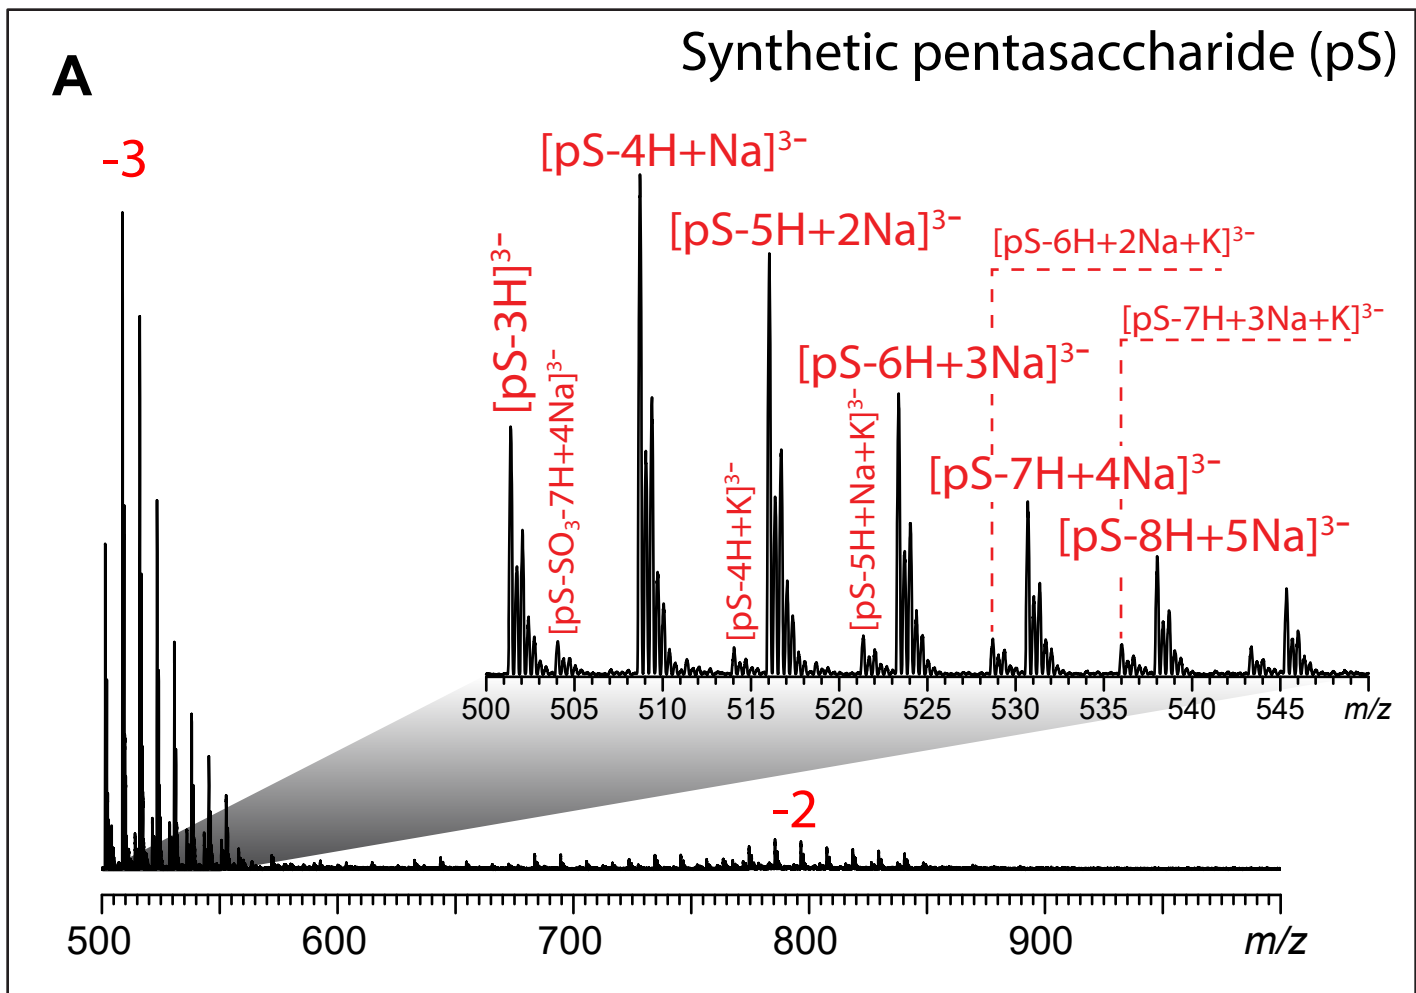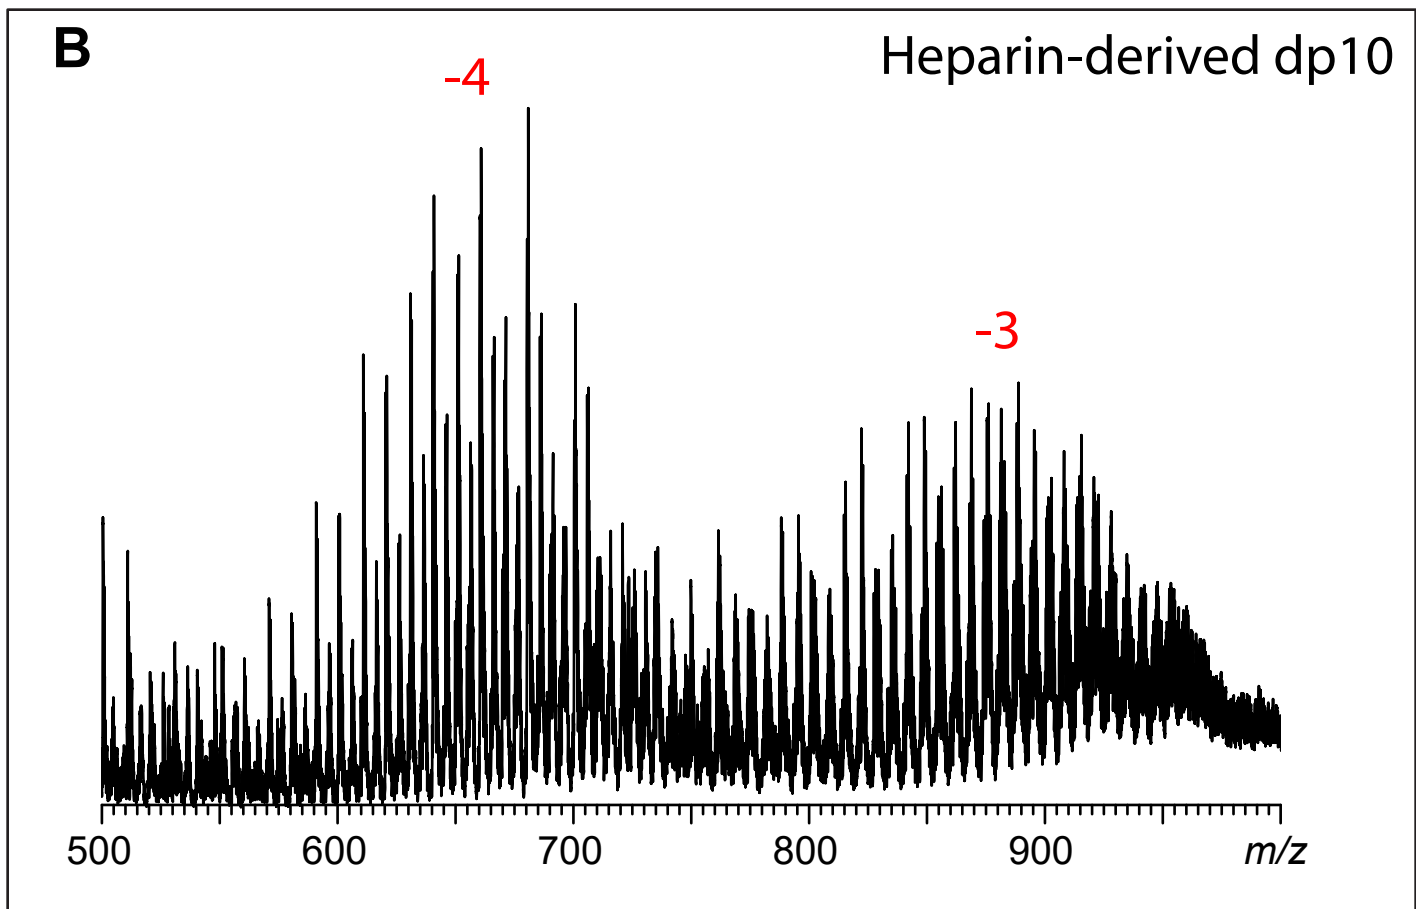

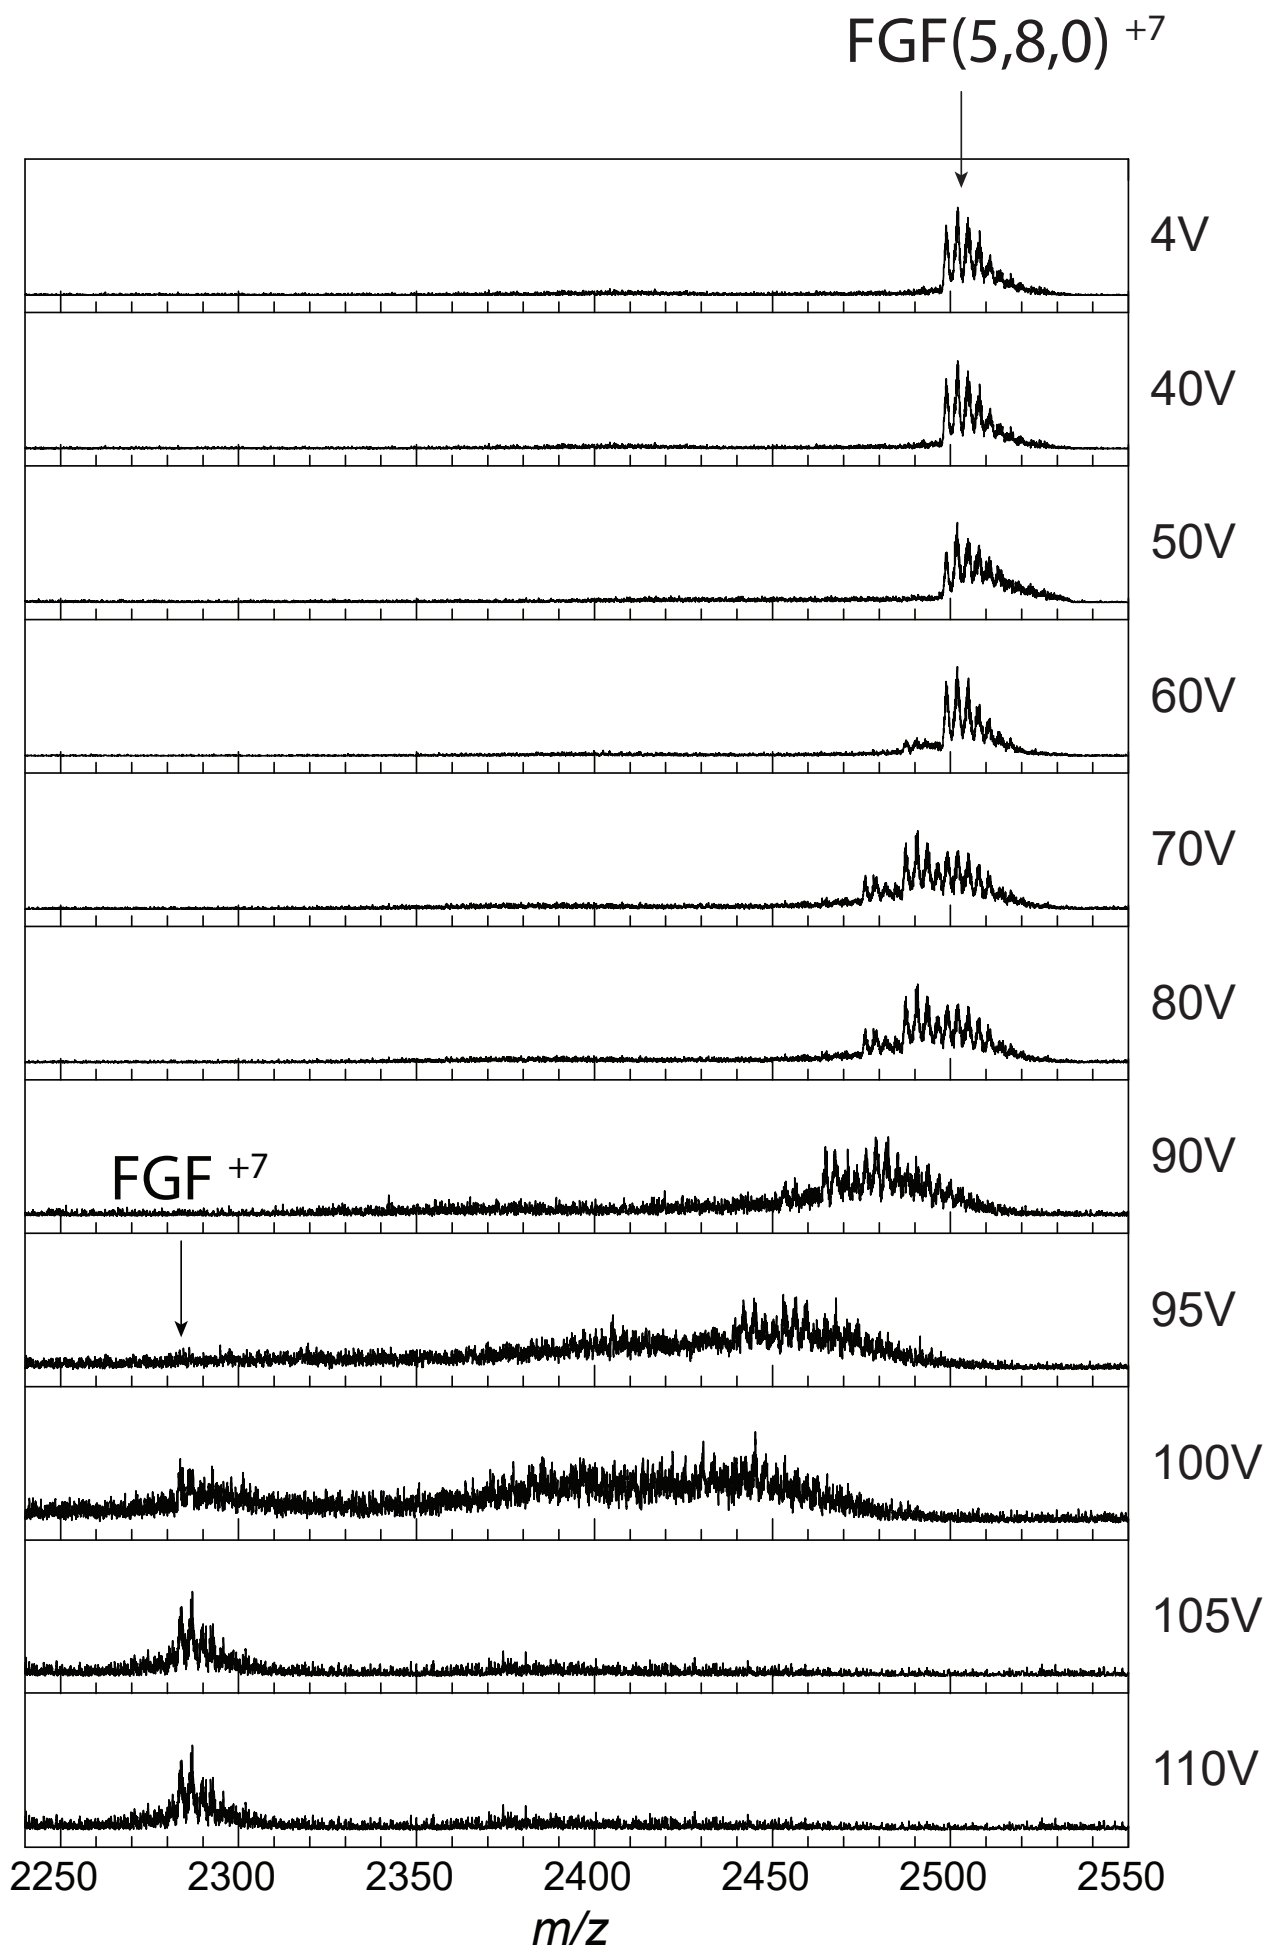

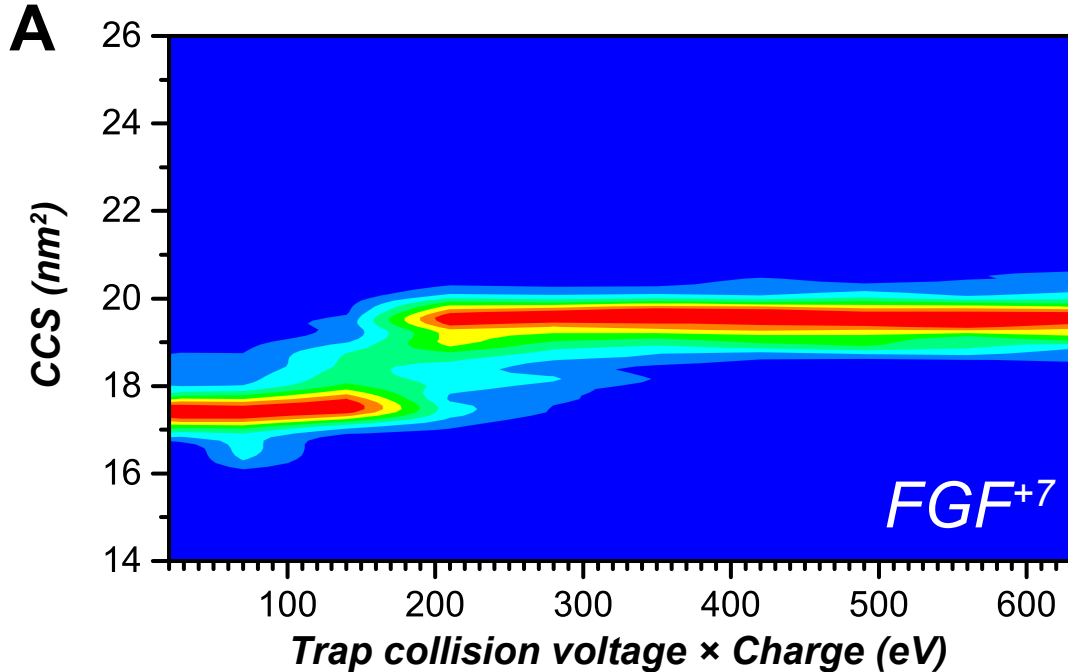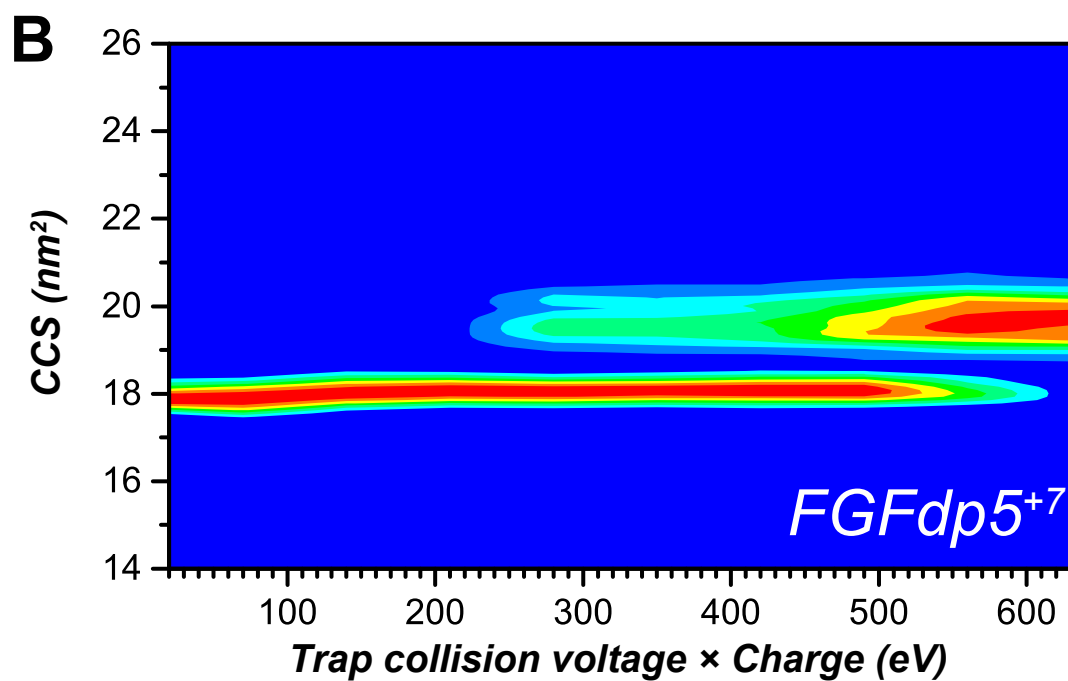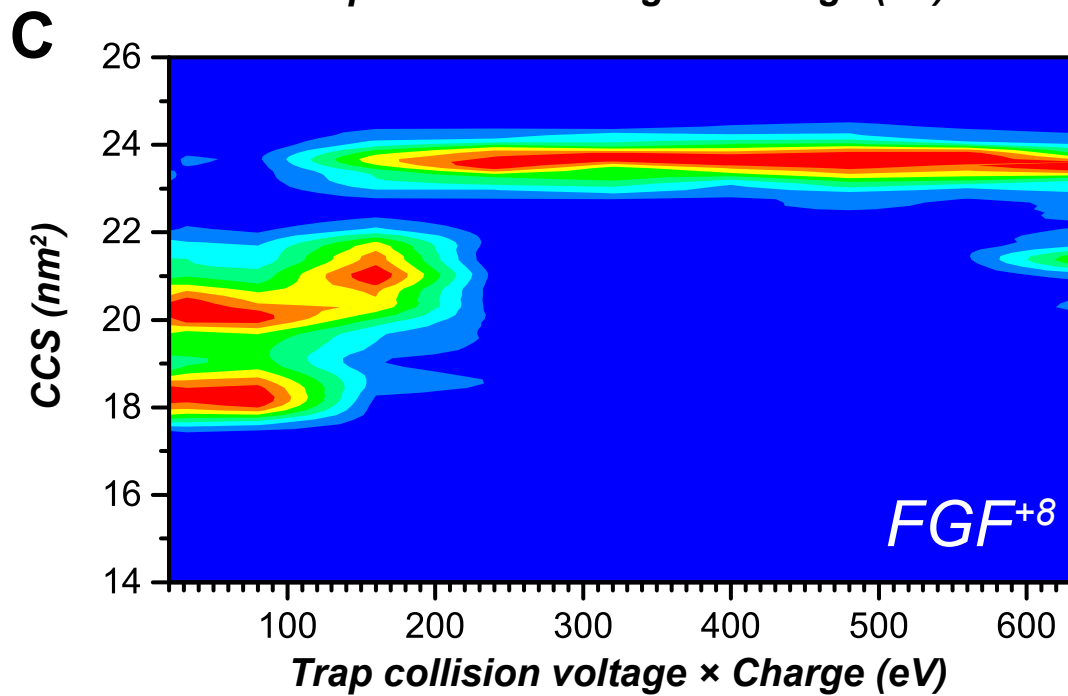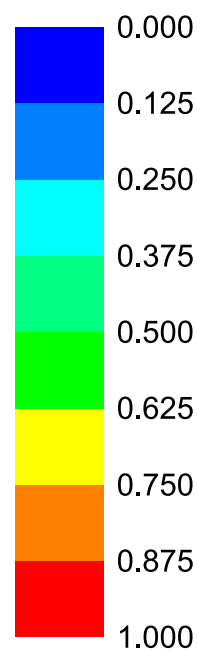

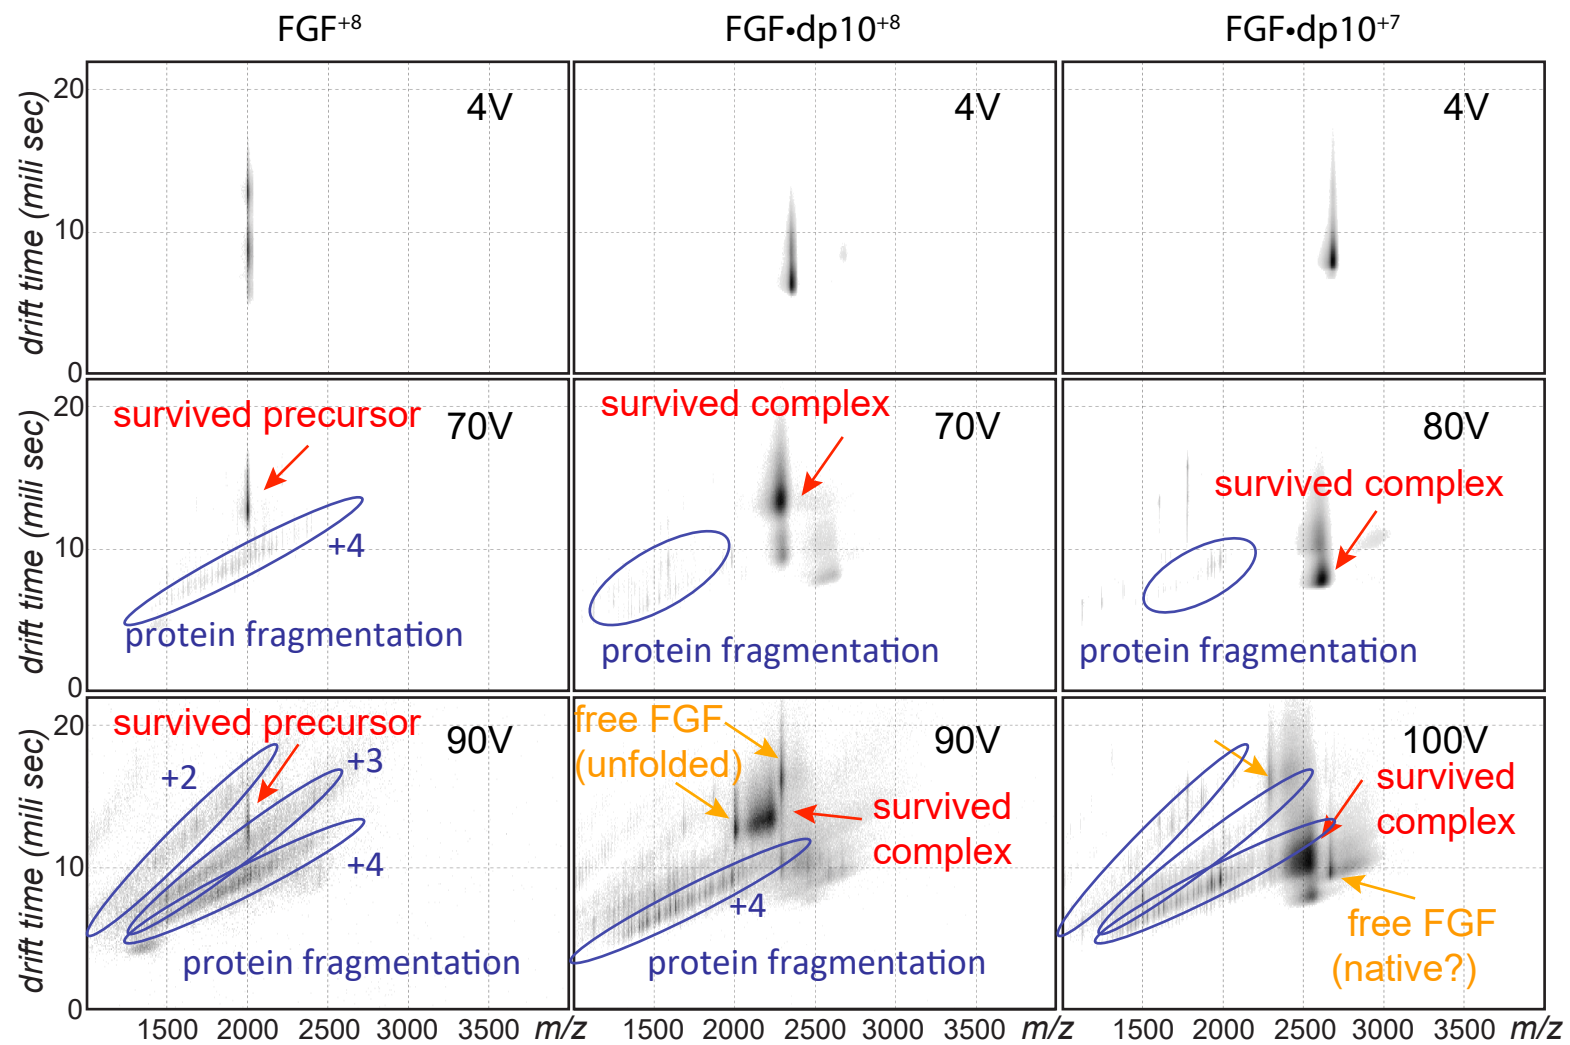

FGF•dp10 (+8)

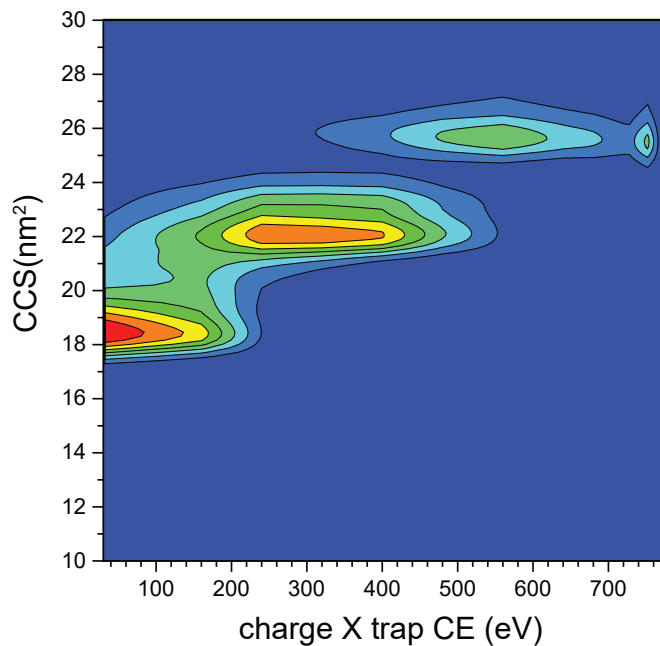

FGF•dp10 (+7)

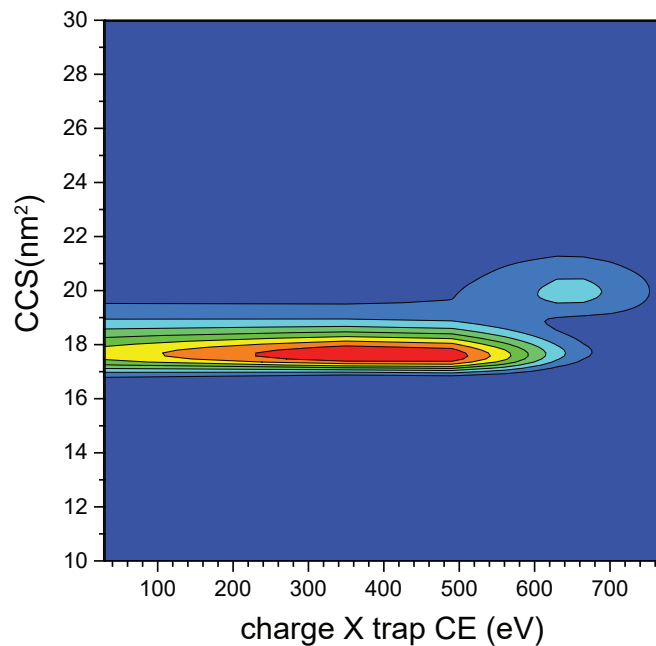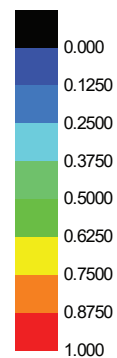

Supplement: NIHMS1574911-supplement-ESI.pdf [file NIHMS1574911-supplement-ESI.pdf]
